# Supplementary material for: A hybrid approach based on k-means and SVM algorithms in selection of appropriate risk assessment methods for sectors
Source: PeerJ Comput Sci. 2024 Jul 26;10:e2198. doi: 10.7717/peerj-cs.2198 (PMC11323151; doi:10.7717/peerj-cs.2198)
Supplement: Supplemental Information 2 [file peerj-cs-10-2198-s002.xlsx]

## Sheet: Sayfa12
Industries	Labor Loss	Effect / Damage Result Scale	Recognizability Detectability	Danger Frequency	Dangerous Situation	Risk Score
Justice and Security	25	3	8	4	35	336
Mining	85	8	3	9	95	810
information technologies	35	3	7	5	40	389
Automotive	55	5	4	7	65	586
Environment	35	4	7	5	55	428
Education	25	4	7	6	45	372
Electrical and Electronics	45	6	4	8	60	618
Energy	65	7	4	9	70	782
finance	25	2	9	4	30	214
food	35	4	6	6	45	386
Build	75	7	3	9	85	744
Business and Management	15	3	8	5	35	280
Metal	75	8	3	9	90	900
Culture, Art and Design	15	3	9	5	35	236
Woodworking, Paper and Paper Products	45	6	4	7	60	574
Media Communication and Broadcasting	35	3	9	5	40	185
Chemical, Petroleum, Rubber and Plastic	75	8	2	9	90	810
Glass, Cement and Soil	65	7	3	9	90	788
Health and Social Facilities	35	4	7	4	55	342
Sports and Recreation	25	4	7	5	40	274
Agriculture, Hunting and Fishing	45	6	4	8	70	402
Textile, Ready-to-Wear, Leather	75	6	3	9	90	684
Commerce(Sales and Marketing)	30	5	5	6	45	476
Social and Personal Services	15	3	8	5	40	224
Tourism and Accommodation Services	30	4	7	6	70	562
Transport, Logistics and Communication	50	6	3	8	80	662
